# Supplementary material
Source: Springer Nature journal article supplement (https://www.springermedizin.de/resource/supplementary/12889_2012_5342_MOESM2_ESM.pdf/9494872)
Supplement: MOESM2 [file 9494872]

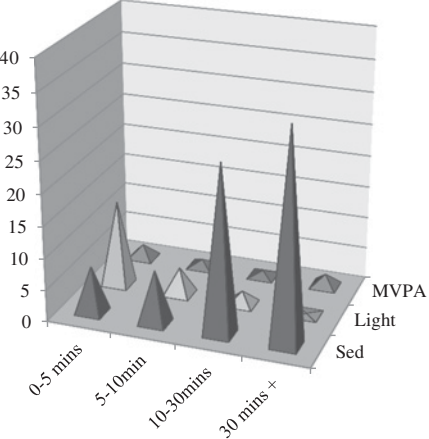

(a) Work day

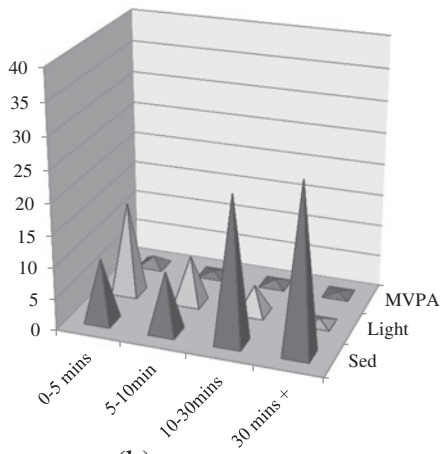

(b) Non-work day

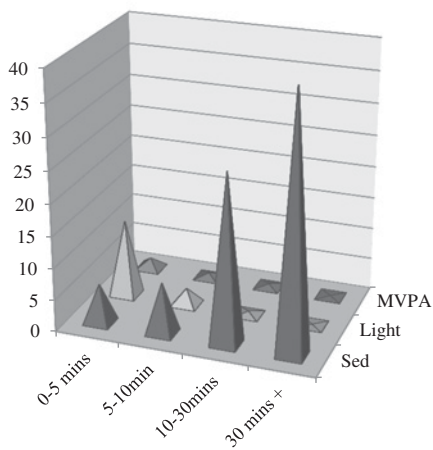

(c) Work hours on work day

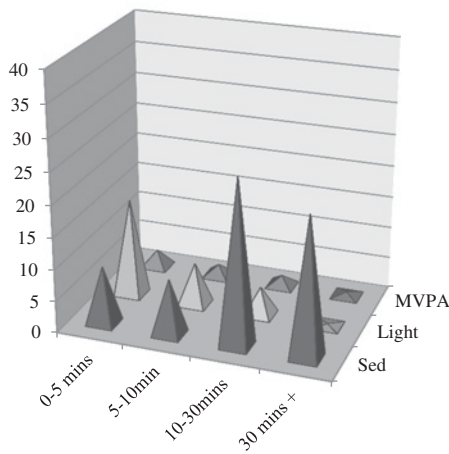

(d) Non-work hours on work day

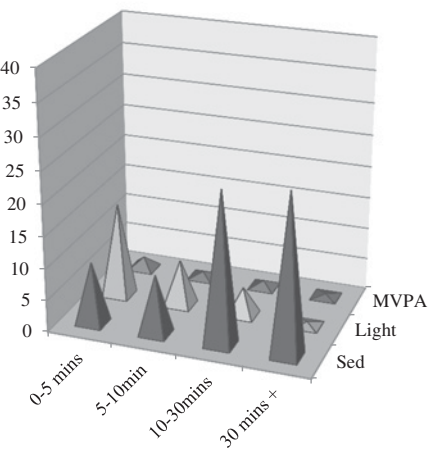

(e) Total non-work time over whole week
